# Supplementary material
Source: PubMed Central journal article supplement (PMC5493742)
Supplement: rsbl20170259supp1.pdf [file rsbl20170259supp1.pdf]

Discovery of the fossil otter *Enhydritherium terraenovae* (Carnivora, Mammalia)  
in México reconciles a paleozoogeographic mystery

Z. Jack Tseng, Adolfo Pacheco-Castro, Oscar Carranza-Castañeda, José Jorge Aranda-Gómez,  
Xiaoming Wang, and Hilda Troncoso

**Electronic Supplemental Materials**

**Biology Letters**

## Systematic Paleontology

Order Carnivora Bowdich, 1821

Suborder Caniformia Kretzoi, 1945

Superfamily Musteloidea Swainson, 1835

Family Mustelidae Swainson, 1835

Subfamily Lutrinae Baird, 1857

*Enhydritherium* Berta and Morgan, 1985

*Enhydritherium terraenovae* Berta and Morgan, 1985

(Figure 2, Table 1)

*Referred specimen and locality*—MPGJ 3586, partial left dentary with m1, broken p4, and alveoli of canine and p1-3. Collected by A. Pacheco-Castro on 23 March 2017 in El Resbalón locality (ZacJuch 47), in a grayish sandstone layer that is approximately 18 m below the U-Pb dated ash layer capping the section with an age of  $5.59 \pm 0.11$  Ma (ESM Figs. 1-2).

*Description and Comparison*—The recovered specimen preserves a single almost complete tooth, m1, that is diagnostic of specimens of *Enhydritherium terraenovae*. As in the holotype UF 18928 and paratype UF 32001, the m1 has a rectangular outline [1]. The anterobuccal border of the tooth, at the position of the paraconid, is broken; nevertheless, the paraconid is preserved, and very rounded in occlusal view. A short buccal cingulum is present at the base of the

hypoconid. The protoconid is bulbous and rounded as in the paraconid, and both are similar in size. The metaconid is about equal in size to the protoconid, and situated directly lingual to it. The buccal cusps (paraconid, protoconid, hypoconid) are more worn than the lingual cusps (metaconid and metastylid). The talonid basin is shallow, with the posterior edge broken. There is a small accessory cusp directly behind the hypoconid, exhibiting wear, but to a lower degree compared to the hypoconid. All of these characteristics are also observed in the holotype (UF 18928), and unlike UF 32001 and UCMP 32970 [1], MPGJ 3586 does not have an accessory cusp behind the metastylid.

### **Depositional Environment of the Juchipila Basin**

The Juchipila Basin occupies a N10E-trending graben, which was formed in the Late Oligocene [2] and that has had several periods of activity after its formation. Graben-fill sediments exposed within the Juchipila graben include diatomaceous marl, clayey lime mudstone, thinly laminated lime mudstone and minor oolitic grainstones and cryptalgal boundstones. In addition to these lithofacies, which were identified and interpreted by López [3] as open lacustrine or transitional (shallow-water lacustrine and fluvial-deltaic lake-margin deposits), in areas that were located closer to the margins of the graben, occur epiclastic-volcanic channel sandstones and conglomerates that represent alluvial fan deposits. Reddish tuffaceous sandstones with rootcasts and reddish tuffaceous claystones often interlayered with green ostracode calcareous mudstones were deposited in floodplain influenced by sedimentary cycles caused by tectonic and climatic variations [3]. Very fine-grained ash-fall layers are commonly interlayered both with the lacustrine and fluvial sediments and suggests active volcanism in a nearby region, outside of the basin. As pointed out by López [3] as whole, lithofacies nature and

distribution, pollen, spores and plant fossils, as well as the fossil mammal fauna [4] are consistent with the presence of an open-basin freshwater perennial lake fed by an axial river and its tributaries within a fault-bounded basin during a period when climate was warm temperate to subtropical. The stratigraphy of the basin-fill sediments [3, 4] and cross-cutting relations between faults and strata in selected outcrops suggest that normal faulting was active during the Late Miocene while the sedimentary sequence accumulated.

The sedimentary sequence at El Resbalón (ESM Fig. 1C), dominated at the base by pale greenish yellow claystone and pale red, sometimes mottled with green, tuffaceous claystones, overlain by fine- to medium-grained volcanoclastic sandstones with few layers of pebble conglomerates represent fluvial floodplain overbank deposits.

### **Biochronology, Geology, and Functional Anatomy**

*Enhydritherium terraenovae* is known from California (San Mateo Formation, late Hemphillian North American Land Mammal Age [NALMA]; Etchegoin Formation, Hemphillian NALMA) [5, 6] and Florida (Upper Member of Bone Valley Formation, late Hemphillian NALMA; Withlacoochee River Site 4A, medial Hemphillian NALMA; Moss Acres Racetrack, medial Hemphillian NALMA) [1, 7] by a single species, *E. terraenovae* (ESM Table 1). In the original description of the genus and species, Berta and Morgan [1] distinguished what they called the “North American sea otter” from the European species of the genus *Enhydriodon*, to which North American specimens were previously referred, by m1 metaconid being larger than the m1 protoconid, m1 with a square-shaped talonid, and presence of m1 metastylid and absence of m1 protostylid. Although our specimen contains only a single relatively complete tooth, m1,

all of these diagnostic characteristics are present (Fig. 2), allowing us to unambiguously refer the new specimen to *E. terraenovae*.

Although previous studies have grouped *Enhydritherium* with the living sea otter based on dentition, evidence from postcranial skeletal remains of *Enhydritherium* suggests that locomotor capabilities are likely different between the two otters [8]. In *Enhydra*, the relative enlargement of hind limb bones is associated with hind limb-propelled locomotion in water, and limited locomotion on land [9]. In contrast, no relative increase in hind limb robusticity is observed in *Enhydritherium*; in fact, the highly robust great tubercle and deltopectoral ridge on the humeri of *Enhydritherium* suggest a fore limb emphasis for walking or for swimming [8]. The increased ability for terrestrial locomotion in *Enhydritherium* relative to *Enhydra* is consistent with our interpretation of an over-land dispersal scenario between Florida and California, via central México.

A recent phylogenetic analysis combining fossil and extant otters unambiguously places *Enhydritherium* in a clade that contains non-marine otters *Paludolutra*, *Paralutra garganensis*, and *Tyrrhenolutra helbingi* [10], a largely middle to late Miocene group from Europe and North America. In contradiction to previous ideas [1, 5], the sea otter is not closely related to *Enhydritherium* in this analysis, i.e., its bunodont dentition is convergent to those in the latter. If this is correct, *Enhydritherium* may not be constrained to marine environments, as also suggested by its postcranial skeletons [8].

Tectonically Juchipila Basin is a north-south oriented graben and together with a series of similarly oriented grabens and half grabens bounded by high-angle normal faults, it forms the southern (Mexican) extension of the Basin and Range Province of the United States [11-13]. Drainages in these basins are controlled by predominant orientations of graben and horst, which

may be initiated as early as early or middle Miocene, but they eventually converge to an east-west oriented drainage system in the form of modern Rio Santiago to the south, offering longitudinal as well as latitudinal dispersals for river-bound organisms.

Given the close association of *E. terraenovae* with near-coast marine habitats, but also with fluvio-lacustrine environments, the question remains whether *E. terraenovae* had similar sensory adaptations to detect prey underwater as in living sea otters. Evidence from cranial endocast and histological studies of sea otters suggests that an enlargement of the coronal gyrus is correlated with greatly increased innervation of the vibrissae [14, 15]. Further research on the only known fragmentary skull of *E. terraenovae*, UF 100000, and future discoveries of complete cranial specimens of this fossil otter will clarify whether *Enhydritherium* had similar expansion of the endocranial regions for increased vibrissae sensitivity. If so, *Enhydritherium* may represent “transitional” otters intermediate between freshwater forms and the entirely marine *Enhydra* in sensory and locomotor adaptations.

**ESM Table 1.** Fossil localities containing *Enhydritherium* and their geologic ages.

| Locality                                            | Formation   | Age                       | Reference                                                                                                                        |
|-----------------------------------------------------|-------------|---------------------------|----------------------------------------------------------------------------------------------------------------------------------|
| Kettleman Hills, CA<br>( <i>Enhydritherium</i> sp.) | San Joaquin | 4.5-2.5 Ma                | Repenning (1976)[5]; Boessenecker (2013)[16]                                                                                     |
| Palmetto Mine, FL                                   | Bone Valley | 4.9-5.3 Ma/L. Hemphillian | Berta and Morgan (1985)[1]; Morgan (2005)[17]                                                                                    |
| Fort Green Mine, FL                                 | Bone Valley | 4.9-5.3 Ma/L. Hemphillian | Berta and Morgan (1985); Morgan (2005)                                                                                           |
| Rockland Mine, FL                                   | Bone Valley | 4.9-5.3 Ma/L. Hemphillian | Berta and Morgan (1985); Morgan (2005)                                                                                           |
| Gardinier Mine, FL                                  | Bone Valley | 4.9-5.3 Ma/L. Hemphillian | Berta and Morgan (1985); Morgan (2005)                                                                                           |
| Payne Creek Mine, FL                                | Bone Valley | 4.9-5.3 Ma/L. Hemphillian | Berta and Morgan (1985); Morgan (2005)                                                                                           |
| Kettleman Hills, CA                                 | Etchegoin   | 4.9-5.3 Ma/L. Hemphillian | Berta and Morgan (1985); Repenning (1976)[5];<br>Scheirer and Magoon (2009)[18]; Boessenecker<br>(2013)[16]                      |
| Lawrence Canyon, CA                                 | San Mateo   | 7-4.6 Ma                  | Barnes et al. (1981)[6]; Berta and Morgan (1985);<br>Repenning (1976); Domning and Deméré (1984)[19];<br>Boessenecker (2013)[16] |
| <b>El Resbalón, MX</b>                              | -           | <b>5.59 Ma</b>            | <b>Carranza-Castañeda et al (2013)[4]</b>                                                                                        |
| Moss Acres Racetrack, FL                            | -           | 7.0-7.5 Ma                | Lambert (1997)[8]; Morgan (2005)                                                                                                 |
| Withlacoochee 4A, FL                                | -           | 7.0-7.5 Ma/M. Hemphillian | Berta and Morgan (1985); Morgan (2005)                                                                                           |

**ESM Figure 1.** Map and geology of locality area. **A.** Regional map showing study area. **B.** Juchipila Basin geology and vertebrate fossil localities. **C.** Stratigraphic section at El Resbalón. All modified from Carranza-Castañeda et al (2013).

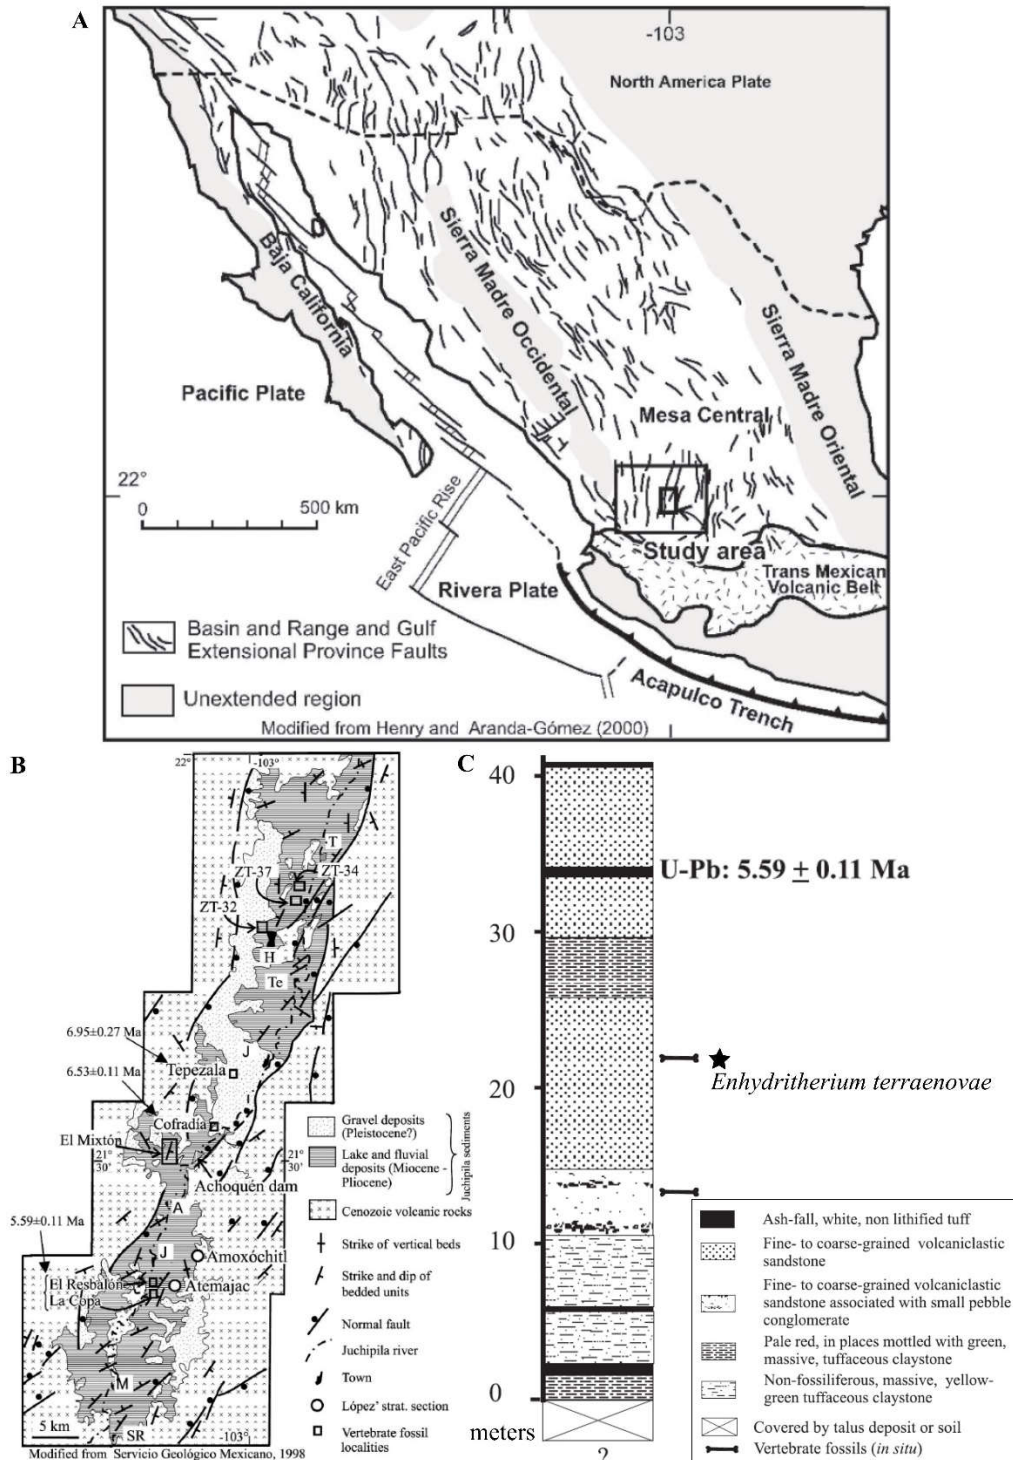



**ESM Figure 2.** Stratigraphic occurrences of *Enhydritherium terraenovae* and proposed dispersal route. Faunal ages as in ESM Table 1. Modified from Carranza-Castañeda et al (2013).

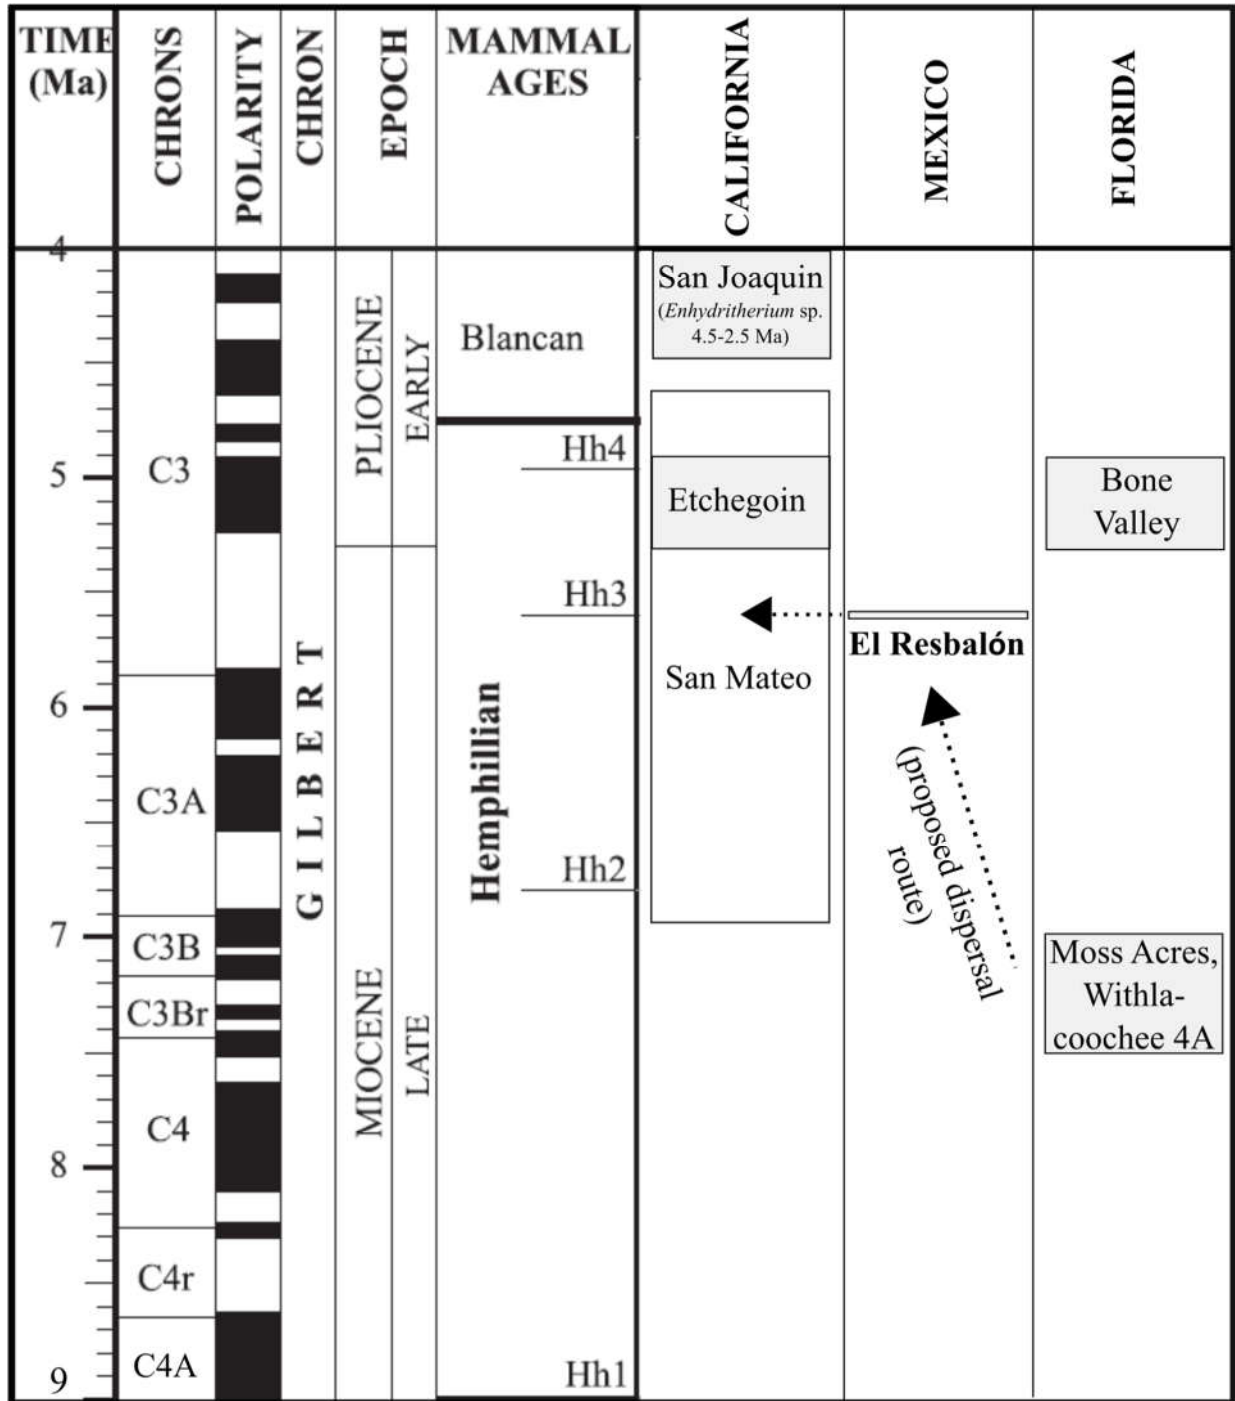

## ESM References

- [1] Berta, A. & Morgan, G.S. 1985 A new sea otter (Carnivora: Mustelidae) from the Late Miocene and Early Pliocene (Hemphillian) of North America. *Journal of Paleontology* **59**, 809-819.
- [2] Nieto-Samaniego, A.F., Ferrari, L., Alaniz-Alvarez, S.A., Labarthe-Hernández, G. & Rosas-Elguera, J.G. 1999 Variation of Cenozoic extension and volcanism across the southern Sierra Madre Occidental volcanic province, Mexico. *Geological Society of America Bulletin* **111**, 347-363.
- [3] López, J.C. 1991 Stratigraphy and petrology of Miocene-Pliocene lacustrine deposits, Juchipila Quadrangle, Zacatecas, Mexico, University of New Orleans.
- [4] Carranza-Castañeda, O., Aranda-Gómez, J., Wang, X. & Iriando, A. 2013 The early-late Hemphillian (Hh2) faunal assemblage from Juchipila Basin, State of Zacatecas, Mexico, and its biochronologic correlation with other Hemphillian faunas in Central Mexico. *Contributions in Science, Natural History Museum of Los Angeles County* **521**, 13-49.
- [5] Repenning, C.A. 1976 *Enhydra* and *Enhydriodon* from the Pacific Coast of North America. *Journal of Research of the United States Geological Survey* **4**, 305-315.
- [6] Barnes, L.G., Howard, H., Hutchison, J.H. & Welton, B.J. 1981 The vertebrate fossils of the marine Cenozoic San Mateo Formation at Oceanside, California. In *Geologic Investigations of the Coastal Plain* (eds. P.L. Abbott & S. O'Dunn), pp. 53-70. San Diego, San Diego Association of Geologists.
- [7] Morgan, G.S. 1994 Miocene and Pliocene Marine Mammal Faunas from the Bone Valley Formation of Central Florida. *Contributions in Marine Mammal Paleontology Honoring Frank C. Whitmore, Jr. Proc. San Diego Soc. Nat. Hist.* **29**, 239-268.
- [8] Lambert, W.D. 1997 The Osteology and Paleoecology of the Giant Otter *Enhydritherium terraenovae*. *Journal of Vertebrate Paleontology* **17**, 738-749.
- [9] Estes, J.A. 1980 *Enhydra lutris*. *Mammalian Species* **133**, 1-8.
- [10] Wang, X., Grohé, C., Su, D., White, S., Ji, X., Kelley, J., Jablonski, N., Deng, T., You, Y. & Yang, X. 2017 A new otter of giant size, *Siamogale melilutra* sp. nov. (Lutrinae: Mustelidae: Carnivora), from

the latest Miocene Shuitangba site in northeastern Yunnan, south-western China, and a total evidence phylogeny of lutrines. *Journal of Systematic Palaeontology*. (doi:10.1080/14772019.2016.1267666).

[11] Henry, C.D. & Aranda-Gómez, J. 1992 The real southern Basin and Range: Mid- to late Cenozoic extension in Mexico. *Geology* **20**, 701-704.

[12] Henry, C.D. & Aranda-Gómez, J. 2000 Plate interactions control middle-late Miocene, proto-Gulf and Basin and Range extension in the southern Basin and Range. *Tectonophysics* **318**, 1-26.

[13] Aranda-Gómez, J. & F.W., M. 1998 Paleogene extension in the southern Basin and Range Province of Mexico: Syndepositional tilting of Eocene red beds and Oligocene volcanic rocks in the Guanajuato mining district. *International Geology Review* **40**, 116-134.

[14] Radinsky, L.B. 1968 Evolution of somatic sensory specialization in otter brains. *Journal of Comparative Neurology* **134**, 495-506.

[15] Marshall, C., Rozas, K., Kot, B. & Gill, V. 2014 Innervation patterns of sea otter (*Enhydra lutris*) mystacial follicle-sinus complexes. *Frontiers in Neuroanatomy* **8**, 1-8.

[16] Boessenecker, R.W. 2013 A new marine vertebrate assemblage from the Late Neogene Purisima Formation in Central California, part II: Pinnipeds and Cetaceans. *Geodiversitas* **35**, 815-940.

[17] Morgan, G.S. 2005 The Great American Biotic Interchange in Florida. *Bulletin of Florida Museum of Natural History* **45**, 271-311.

[18] Scheirer, A. & Magoon, L. 2009 Neogene Gas Total Petroleum System -- Neogene Nonassociated Gas Assessment Unit of the San Joaquin Basin Province: Chapter 22 in Petroleum systems and geologic assessment of oil and gas in the San Joaquin Basin Province, California. *USGS Professional Papers* **1713-22**, 1-14.

[19] Domning, D.P. & Deméré, T.A. 1984 New material of *Hydrodamalis cuestae* (Mammalia: Dugongidae) from the Miocene and Pliocene of San Diego County, California. *Transactions of the San Diego Society of Natural History* **29**, 99-124.
